# Supplementary material
Source: publisher site journal article supplement (https://www.spandidos-publications.com/1746/downloadSupplementary)

Figure S1. Representative flow cytometry plots of MC3T3-E1 cell apoptosis. GaN, gallium nitride; siRNA, small interfering RNA; TRPM7, transient receptor potential melastatin 7.

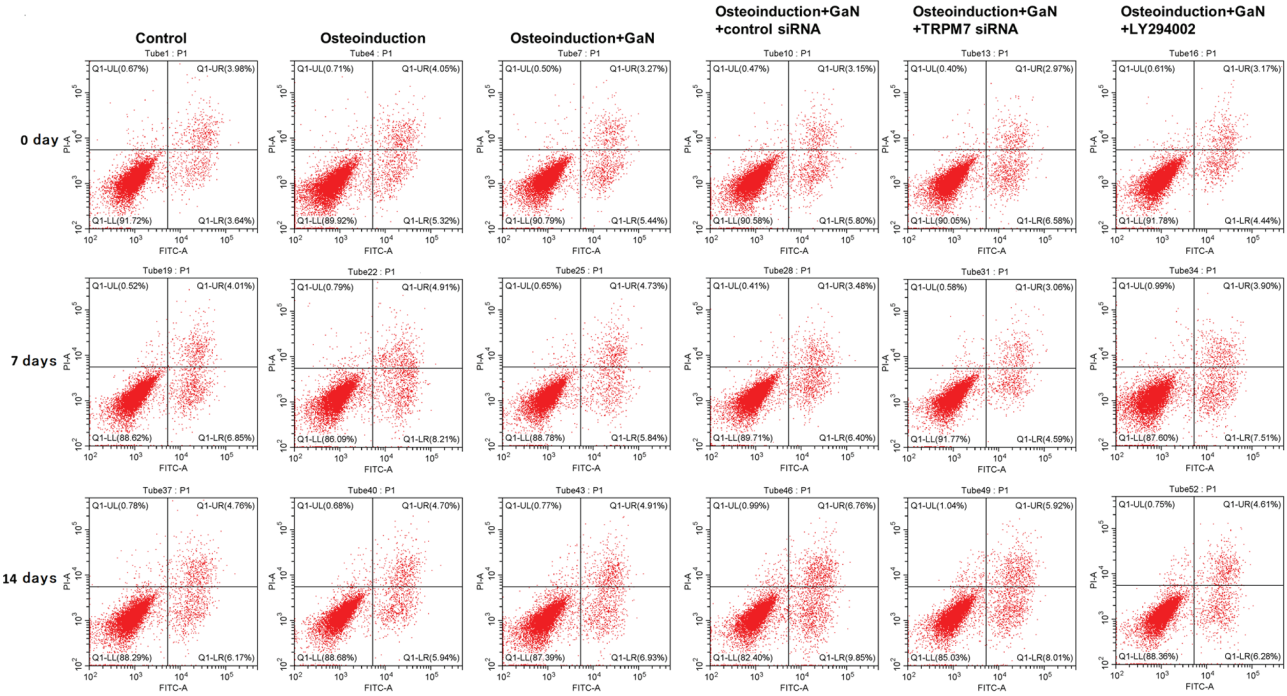

Figure S2. Representative flow cytometry plots of hFOB1.19 cell apoptosis. GaN, gallium nitride; siRNA, small interfering RNA; TRPM7, transient receptor potential melastatin 7.

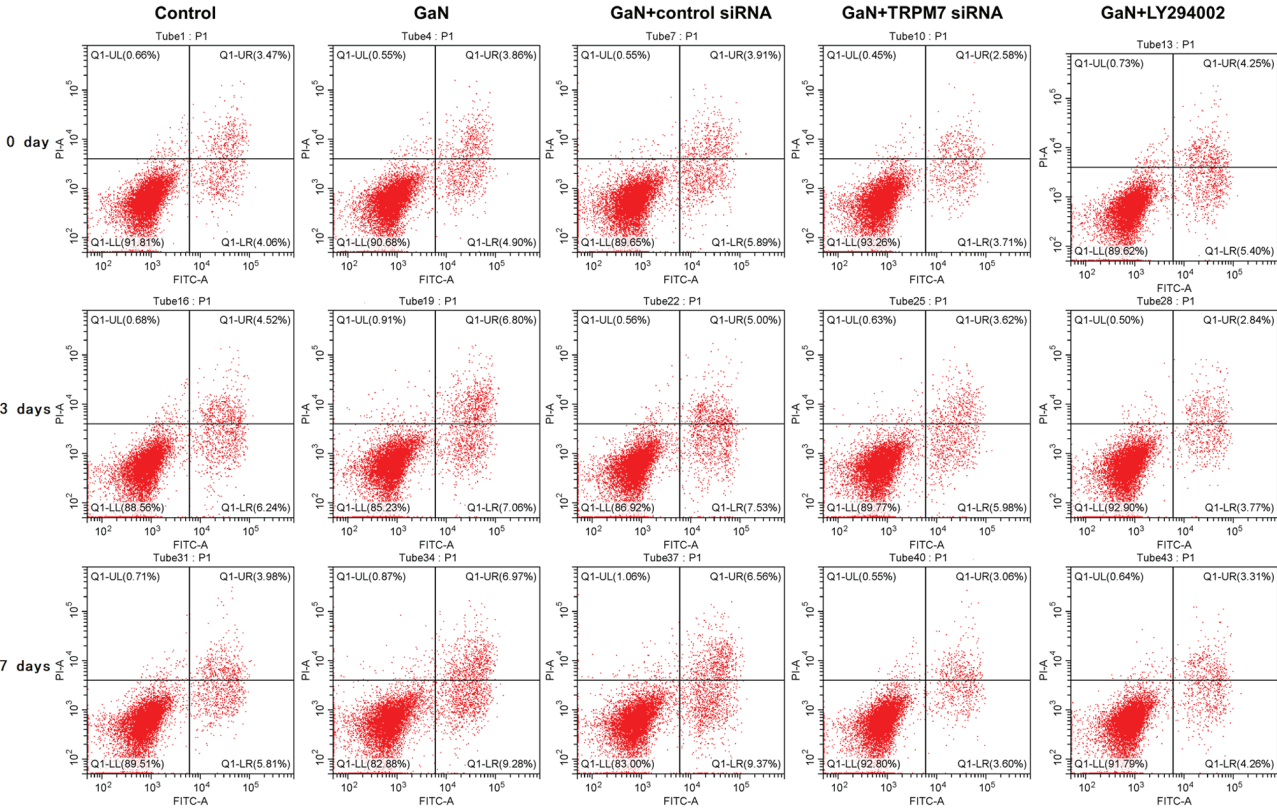

Supplement: Supplementary file 1 [file downloadSupplementary]
